# Supplementary material
Source: PubMed Central journal article supplement (PMC1413853)

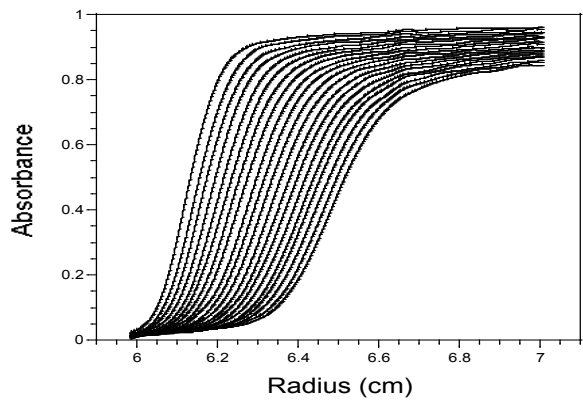

A

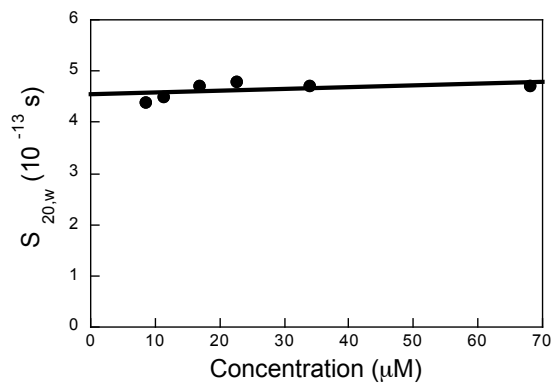

B

Supplement: pnas_0511263103_1.pdf [file pnas_0511263103_1.pdf]
